# Supplementary material
Source: PubMed Central journal article supplement (PMC3697638)
Supplement: JB.02254-12_zjb999092678so1.pdf [file JB.02254-12_zjb999092678so1.pdf]

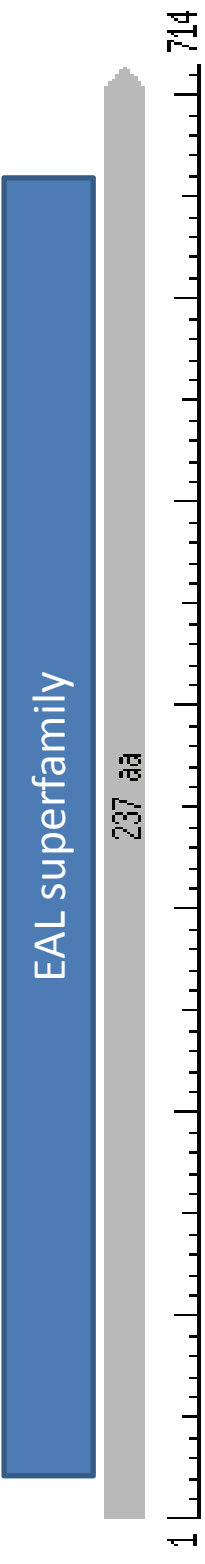

```

MKIFLENLYHSDCYFLPIRDNQDQLVGVELITHFSSEDGTVRIPTSRVIAQLTVEQHWQLFSEQLELLKS
^ ^ ^ * ^ * ^ * ^ * *
CQHFFIQHKLFAWLNLTPQVATLLLDRDNFAGELLKYPFELLINENYPHFNEGKDNRDLLSLSQMYPLV
* ^
LGNLGAGNSTMKAVFDGLFTRVMLDKSFIQQITHRSFEPFIRAIQAISPCCNCIAGGIDTPEILAQI
* ^ * * * * * * * * * * * * * * * * * * * * * * * * * * * * * * * * * * * * * * *
IPFDFHALQGCLWPAVPINQITTLVQR
*

```

- \* 100% conserved in 21 YdiV homolog alignment
- ^ 90-95% conserved in 21 YdiV homolog alignment
- Red** = site directed mutation to alanine
- Bold** = EAL domain
